## Reliable detection of atrial fibrillation with a medical wearable under inpatient conditions (CoMMoD-A-fib)

M. Jacobsen<sup>1</sup>, T.A. Dembek<sup>2</sup>, A.P. Ziakos<sup>3</sup>, G. Kobbe<sup>4</sup>, M. Kollmann<sup>5</sup>, L. Heinemann<sup>6</sup>, A. Sause<sup>3</sup>, N. Deubner<sup>3</sup>, S. Isenmann<sup>1</sup>, M. Seyfarth<sup>3</sup>

<sup>1</sup>University of Witten/Herdecke, Witten, Germany; <sup>2</sup>University of Cologne, Neurology, Cologne, Germany; <sup>3</sup>Helios Clinic Wuppertal, Cardiology, Wuppertal, Germany; <sup>4</sup>University Hospital Duesseldorf, Duesseldorf, Germany; <sup>5</sup>Heinrich Heine University, Duesseldorf, Germany; <sup>6</sup>Institute for Metabolic Research GmbH, Neuss, Germany

**Funding Acknowledgement:** Type of funding source: Public Institution(s). Main funding source(s): Internal grant program (PhD and Dr. rer. nat. Program Biomedicine) of the Faculty of Health at Witten/Herdecke University, Germany. HELIOS Kliniken GmbH (Grant-ID 047476), Germany

**Background:** Atrial fibrillation (A-fib) is the most common arrhythmia; however, detection of A-fib is a challenge due to irregular occurrence.

**Purpose:** Evaluating feasibility and performance of a non-invasive medical wearable for detection of A-fib.

**Methods:** In the CoMMoD-A-fib trial admitted patients with a high risk for A-fib carried the wearable and an ECG Holter (control) in parallel over a period of 24 hours under not physically restricted conditions. The wearable with a tight-fit upper arm band employs a photoplethysmography (PPG) technology enabling a high sampling rate. Different algorithms (including a deep neural network) were applied to 5 min PPG datasets for detection of A-fib. Proportion of monitoring time automatically interpretable by algorithms (= interpretable time) was analyzed for influencing factors.

**Results:** In 102 inpatients (age 71.0±11.9 years; 52% male) 2306 hours

of parallel recording time could be obtained; 1781 hours (77.2%) of these were automatically interpretable by an algorithm analyzing PPG derived intervals. Detection of A-Fib was possible with a sensitivity of 92.7% and specificity of 92.4% (AUC 0.96). Also during physical activity, detection of A-fib was sufficiently possible (sensitivity 90.1% and specificity 91.2%). Usage of the deep neural network improved detection of A-fib further (sensitivity 95.4% and specificity 96.2%). A higher prevalence of heart failure with reduced ejection fraction was observed in patients with a low interpretable time (p=0.080).

**Conclusion:** Detection of A-fib by means of an upper arm non-invasive medical wearable with a high resolution is reliably possible under inpatient conditions.
